# Supplementary material for: Non-inferiority of creatinine excretion rate to urinary L-FABP and NGAL as predictors of early renal allograft function
Source: PubMed Central journal article supplement (PMC4107724; doi:10.1186/1471-2369-15-117), 2014-07-16

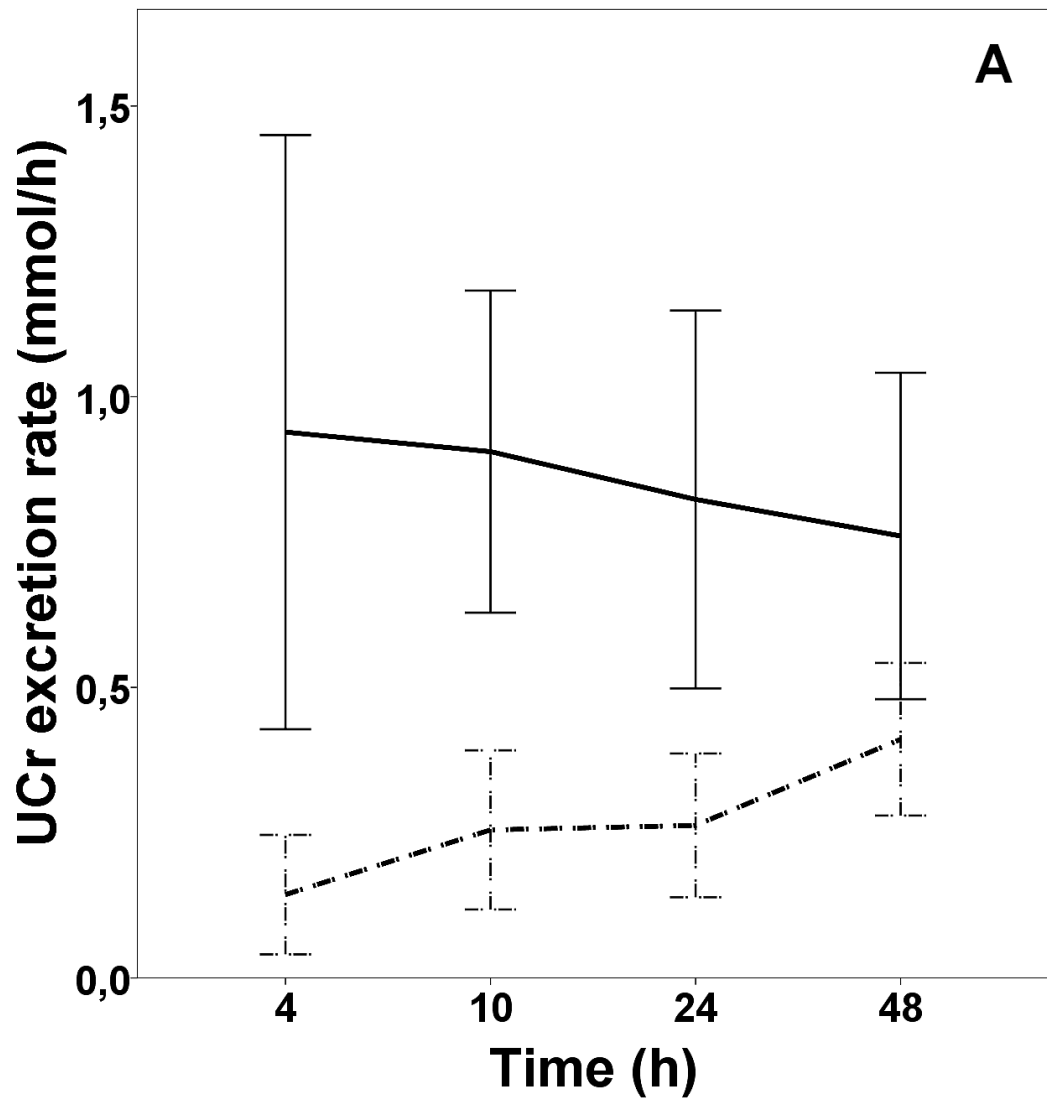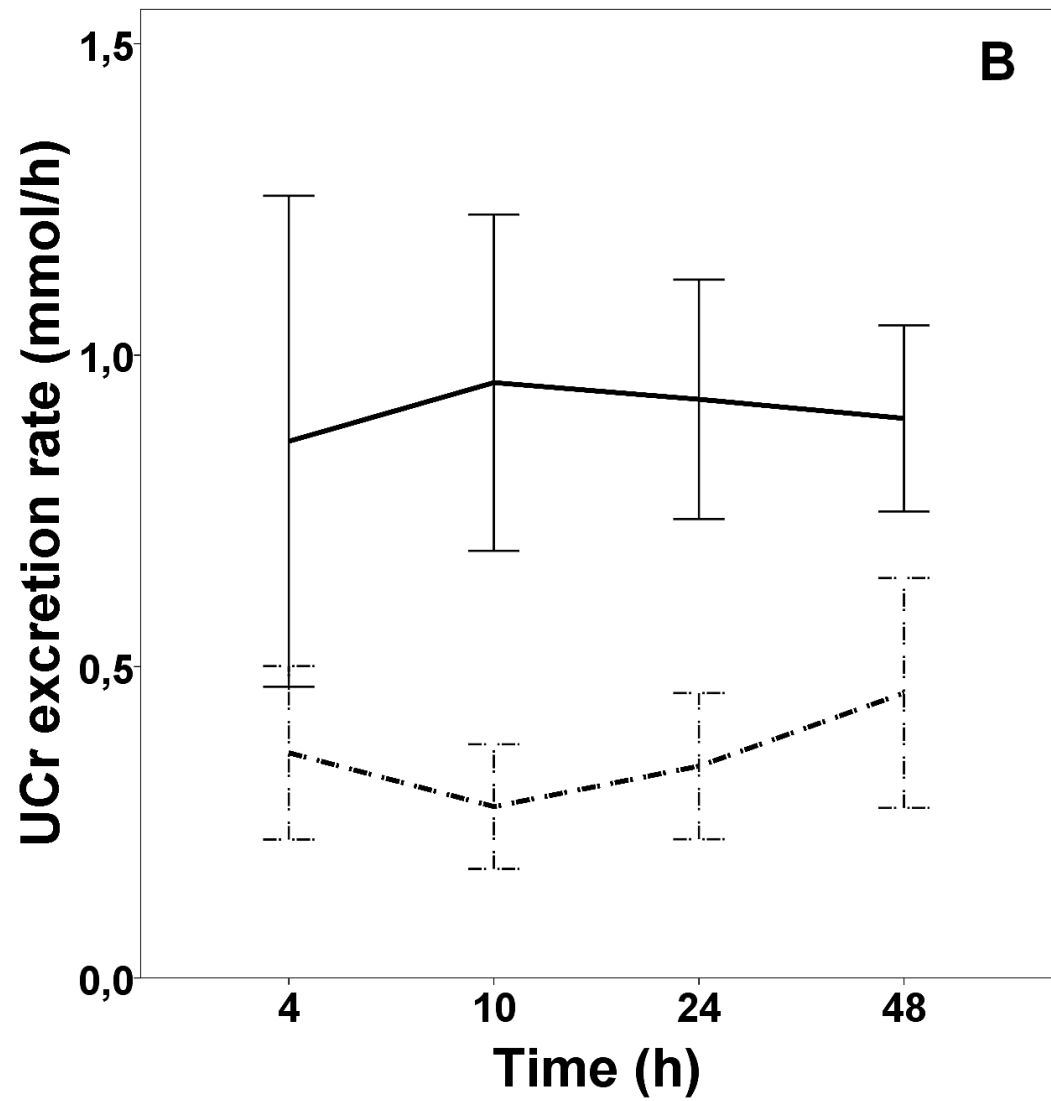

Supplement: 1471-2369-15-117-S1.pdf [file 1471-2369-15-117-S1.pdf]
